# Supplementary material
Source: publisher figshare collection journal article supplement (https://karger.figshare.com/ndownloader/files/24874868)
Supplement: Supplementary file 1 [file 24874868]

**Supplementary Table 1:** Sociodemographic data of adult PKU patients in comparison to age-matched German population

|  | **PKU patients** | **German population** |
| --- | --- | --- |
| Mean age | 38 years | 41 years |
| Age range | 18-53 years | 18-65 years |
| Single living persons | 47% | 21.5% |
| Rate of children per person | 0.4 | 1.34 |
| Education:  A level | 40% | 33% |
| Advanced technical college | 10% | 12% |
| Secondary school | 31% | 23% |
| Junior high school | 14% | 17% |
| No graduation | 6% | 6% |
